# Supplementary material for: The Australian Institute of Sport (AIS) and National Eating Disorders Collaboration (NEDC) position statement on disordered eating in high performance sport
Source: PubMed Central journal article supplement — Br J Sports Med. 2020 Jul 13;54(21):1247–58. doi: 10.1136/bjsports-2019-101813 (PMC7588409; doi:10.1136/bjsports-2019-101813), 2020-07-13
Supplement: bjsports-2019-101813supp001.pdf [file bjsports-2019-101813supp001.pdf]

## Supplementary data

**Table S1:** Medical history when assessing an athlete with DE <sup>4 9 50 79 80</sup>

|                    |                                                                                                                                                                                                                                                                              |
|--------------------|------------------------------------------------------------------------------------------------------------------------------------------------------------------------------------------------------------------------------------------------------------------------------|
| <b>General</b>     | <ul style="list-style-type: none"> <li>▪ Medical</li> <li>▪ Surgical</li> <li>▪ Musculoskeletal</li> <li>▪ Family history (ED, osteoporosis (OP), menstrual)</li> <li>▪ Medications and supplements</li> <li>▪ Allergies</li> </ul>                                          |
| <b>Bone health</b> | <ul style="list-style-type: none"> <li>▪ Bone stress injury</li> <li>▪ BMD</li> <li>▪ Calcium intake</li> <li>▪ Vitamin D (sunlight &amp; dietary intake)</li> <li>▪ Mechanical loading</li> <li>▪ Family history OP</li> </ul>                                              |
| <b>Female</b>      | <ul style="list-style-type: none"> <li>▪ Age of menarche</li> <li>▪ Length and frequency of periods (number of cycles per year), regularity, last normal menstrual period, flow</li> <li>▪ Amenorrhoea (frequency and duration)</li> <li>▪ Oral contraceptive use</li> </ul> |
| <b>Male</b>        | <ul style="list-style-type: none"> <li>▪ Loss of morning erections</li> <li>▪ Decreased libido.</li> </ul>                                                                                                                                                                   |

**Table S2:** Examinations to perform when assessing athletes with DE. <sup>7 9 10 49 80</sup>

|                                             |                                                                                                                                                                                     |
|---------------------------------------------|-------------------------------------------------------------------------------------------------------------------------------------------------------------------------------------|
| <b>Basic observations</b>                   | <ul style="list-style-type: none"> <li>▪ Heart rate (HR), blood pressure (BP), (including postural measures of HR and BP) temperature</li> </ul>                                    |
| <b>Pre-participation system examination</b> | <ul style="list-style-type: none"> <li>▪ Cardiorespiratory, abdominal, thyroid, ear/nose/throat, lymph nodes</li> </ul>                                                             |
| <b>Specific systems of concern</b>          | <ul style="list-style-type: none"> <li>▪ Bones stress injury examination</li> </ul>                                                                                                 |
| <b>Advanced ED</b>                          | <ul style="list-style-type: none"> <li>▪ Lanugo, particularly, sub-conjunctival haemorrhages, swelling of parotid glands, erosion of tooth enamel, bradycardia, s oedema</li> </ul> |
| <b>Primary amenorrhoea</b>                  | <ul style="list-style-type: none"> <li>▪ Gynaecological examination recommended <sup>80</sup></li> </ul>                                                                            |
| <b>Adolescent</b>                           | <ul style="list-style-type: none"> <li>▪ Stage of sexual maturation (Tanner) <sup>81</sup></li> </ul>                                                                               |

**Table S3: Investigations to perform on athletes with suspected DE.** <sup>7 9 10 13 20 26 34 80</sup>

| <b>First line</b>                                     | <b>Tests</b>                                                                                                                                                                                                                                                                                       |
|-------------------------------------------------------|----------------------------------------------------------------------------------------------------------------------------------------------------------------------------------------------------------------------------------------------------------------------------------------------------|
| <b>General screen</b>                                 | FBC, EUC, LFT, CRP, iron studies<br><br>Lipid screen (fasting): total cholesterol, LDL, HDL, TG<br><br>Blood glucose<br><br>CMP, 25-OH vitamin D, +/- PTH<br><br>Beta-hcg*, urine analysis<br><br>Electrocardiogram (ECG)**<br><br>+/- DXA BMD***                                                  |
| <b>Hormonal screen</b>                                |                                                                                                                                                                                                                                                                                                    |
| <b>General endocrine</b>                              | TSH, T3                                                                                                                                                                                                                                                                                            |
| <b>Female menstrual dysfunction</b> <sup>7 9 50</sup> | LH, FSH, oestradiol, 17-OH-progesterone (morning), prolactin, cortisol (morning), freeT4<br><br>If evidence of hyperandrogenism (hirsutism, acne, androgenic alopecia): testosterone (free & total), DHEA-S, androstenedione, SHBG +/- progesterone challenge test<br><br>+/- Abdominal/pelvic USS |
| <b>Male hormonal screen</b> <sup>34 80</sup>          | Testosterone (free & total) (morning), oestradiol, SHBG, prolactin<br><br>Cortisol, DHEA-S, androstenedione                                                                                                                                                                                        |
| <b>Second Line</b>                                    |                                                                                                                                                                                                                                                                                                    |
| <b>Biomarkers</b>                                     |                                                                                                                                                                                                                                                                                                    |
| <b>Appetite hormones</b> <sup>26 34</sup>             | Leptin, ghrelin (females)                                                                                                                                                                                                                                                                          |
| <b>Bone Formation</b> <sup>81</sup>                   | BS-ALKP, osteocalcin                                                                                                                                                                                                                                                                               |
| <b>Bone Resorption</b> <sup>81</sup>                  | N- and C-terminal telopeptides, deoxypyridinoline<br><br>Urinary pyridinoline                                                                                                                                                                                                                      |
| <b>Other</b> <sup>34</sup>                            | IGF-1, PYY, insulin, adiponectin, oxytocin                                                                                                                                                                                                                                                         |

| <b>Key/Notes:</b>                                                                                                                                                                                                                                                                                                                                                                                                                                                                                                                                                                                                                                                                                                                         |
|-------------------------------------------------------------------------------------------------------------------------------------------------------------------------------------------------------------------------------------------------------------------------------------------------------------------------------------------------------------------------------------------------------------------------------------------------------------------------------------------------------------------------------------------------------------------------------------------------------------------------------------------------------------------------------------------------------------------------------------------|
| *Beta-hcg urine or blood test as appropriate in female athletes                                                                                                                                                                                                                                                                                                                                                                                                                                                                                                                                                                                                                                                                           |
| **Electro conductive disturbances from electrolyte abnormalities <sup>80</sup>                                                                                                                                                                                                                                                                                                                                                                                                                                                                                                                                                                                                                                                            |
| ***DXA is the gold standard BMD measure <sup>26</sup>                                                                                                                                                                                                                                                                                                                                                                                                                                                                                                                                                                                                                                                                                     |
| Full Blood Count (FBC), Electrolytes Urea Creatinine (EUC), Liver Function Test (LFT), C-Reactive Protein (CRP), Calcium Magnesium Phosphate (CMP), Low Density Lipoprotein (LDL), High Density Lipoprotein (HDL), Triglycerides (TG), Calcium Magnesium Phosphate (CMP), Parathyroid hormone (PTH), Beta-Human Chorionic Gonadotrophin (Beta-hcg) Dual Energy X-ray Absorptiometry (DXA), Bone Mineral Density (BMD), Thyroid Stimulating Hormone (TSH), Tri-iodothyronine (T3), Luteinising Hormone (LH), Follicular Stimulating Hormone (FSH), Dehydroepiandrosterone Sulphate (DHEAS), Sex Hormone Binding Globulin (SHBG), Ultrasound Scan (USS), Bone Specific Alkaline-Phosphatase (BS-ALKP) Insulin-like Growth Factor-1 (IGF-1). |

**Table S4:** A summary of the potential hormonal and physiological changes in athletes with LEA synthesised from the articles; parallels with the female athlete triad in male athletes by Tenforde et al. (2016), low energy availability in athletes: a review of prevalence, dietary patterns, physiological health, and sports performance by Logue et al. (2017), endocrine effects of RED-S by Elliott-Sale et al. (2018.) <sup>26 34 35</sup>

| Hormone/physiology component | Female | Male | Hormone/physiology component | Female | Male |
|------------------------------|--------|------|------------------------------|--------|------|
| Body Mass Index              | ↓      | ↓    | Insulin                      | ↓      | ↓    |
| Fat mass                     | ↓      | ↓    | IGF-1                        | ↓      | ↓    |
| RMR                          | ↓      | ↓    | T3                           | ↓      | ↓    |
| BMD                          | ↓      | ↓    | Cortisol                     | ↑      | ↑    |
| Leptin                       | ↓      | ↓    | Oestradiol                   | ↓      | -    |
| Adiponectin                  | ↑      | -    | Progesterone                 | ↓      | -    |

|                                   |   |   |                                            |   |   |
|-----------------------------------|---|---|--------------------------------------------|---|---|
| <b>Ghrelin</b>                    | ↑ | ↔ | <b>Testosterone</b>                        | - | ↓ |
| <b>Peptide YY (PYY) (fasting)</b> | ↑ | ↑ | <b>Sex Hormone Binding Globulin (SHBG)</b> | - | ↑ |
| <b>Oxytocin</b>                   | ↓ | ↓ | <b>LH</b>                                  | ↓ |   |
|                                   |   |   | <b>FSH</b>                                 | ↓ |   |
